# Supplementary material
Source: MDPI journal article supplement (https://www.mdpi.com/2673-4591/6/1/80)
Supplement: s1 [file s1]

# Evaluation of the electrochromic response of polypyrrole in the presence of CO<sub>2</sub> in the solution

**Vilma Ratautaite**<sup>1,\*</sup>, Raimonda Boguzaitė<sup>1</sup>, Gintautas Bagdziūnas<sup>1</sup>, Ernestas Brazys<sup>2</sup>, Almira Ramanaviciene<sup>2</sup>, and Arunas Ramanavicius<sup>2</sup>

<sup>1</sup> Center for Physical Sciences and Technology, Department of Functional Materials and Electronics, Laboratory of Nanotechnology, Sauletekio av. 3, Vilnius LT-10257, Lithuania

<sup>2</sup> Vilnius University, Institute of Chemistry, Department of Physical Chemistry, Naugarduko 24, Vilnius LT-03225, Lithuania

<sup>3</sup> NanoTechnas – Center of Nanotechnology and Materials Science, Institute of Chemistry, Faculty of Chemistry and Geosciences, Vilnius University, Naugarduko str. 24, Vilnius LT-03225, Lithuania

## Abstract:

The indium tin oxide (ITO) coated glass was used as a working electrode for electrochemical deposition of conducting polymer polypyrrole (Ppy). Before polymerization, the electrode surface was additionally modified with triethoxymethylsilane (TEMS) to provide better adhesion of polypyrrole to the surface of ITO [1]. Polymerization of Ppy was performed electrochemically regarding the previous studies [2, 3, 4]. The ionic strength of the solution was supported by LiClO<sub>4</sub>.

Since the dissolved CO<sub>2</sub> in the solution forms the weak acid and thus the pH of a solution can be slightly changed the electrochromic response to the pH changes was evaluated. Britton – Robinson buffer (BRB) was used as the model system for evaluation of the electrochromic response of polypyrrole at different pH values and concentrations of NaHCO<sub>3</sub>, which was a source of CO<sub>2</sub> in the solution.

For the evaluation of electrochromic response in the presence of CO<sub>2</sub> the double potential step chronoamperometry method was applied and UV-Vis absorption spectra were registered. To gain insight into the charge transfer phenomenon in more detail, the cyclic voltammetry experiments at different glass/ITO(TEMS)/Ppy electrode potential sweep rates were performed.

**Keywords:** conductive polymer; polypyrrole (Ppy); electrochemical polymerization; electrochromic properties.

## Experimental:

### Materials and methods:

All the chemicals were of analytical grade and were used as obtained except pyrrole, which distilled before the use.

Britton – Robinson buffer (BRB): 0.01 M boric acid, 0.01 M acetic acid, 0.01 M phosphoric acid, and 0.1 M LiClO<sub>4</sub>. The pH of BRB was adjusted with 1.0 M NaOH.

### Pretreatment of indium tin oxide coated glass electrode (ITO):

15–25 Ω/sq was purchased from Sigma-Aldrich (Steinheim, Germany) was cleaned in several steps: 1) ultra-pure water; 2) 27% NH<sub>4</sub>OH and 30% H<sub>2</sub>O<sub>2</sub> mixed at ratio 3:1 and preheated up to 50°C for the 5 min; 3) water for 15 min; 4) acetone for 15 min; 5) water for 15 min.

### Modification of ITO:

The glass/ITO surface was modified with 4% (v/v) solution of triethoxymethylsilane (TEMS) in acetone overnight and correspondingly TEMS modified structure (glass/ITO(TEMS)) was formed. After modification, ITO was washed with acetone and ultra-pure water.

### Electrochemical deposition of polypyrrole (Ppy) on ITO:

A computer-controlled potentiostat/galvanostat PGSTAT 128N with Nova 1.10 software from Eco-Chemie (Utrecht, The Netherlands) was used electrochemical measurements. Pyrrole was polymerized electrochemically from a solution containing 10 mM of pyrrole and 0.1 M of LiClO<sub>4</sub>.

Three electrode system consisted of:

RE – Ag/AgCl<sub>(3M KCl)</sub>; CE – platinum wire, and WE – glass/ITO/Ppy.

### Evaluation:

The absorbance was measured with a spectrometer USB4000-FL with 'SpectraSuite' software (Ocean Optics, Largo, USA).

Absorbance spectra were registered during a potential alternation from –0.9 V to +0.2 V in the BRB solution, pH 2.3 and pH 7.

## Conclusions:

It was demonstrated, that there is dependence of absorbance at 750 nm wavelength on the concentration of NaHCO<sub>3</sub> in the BRB solution only if pH is acidic, i.e. pH 2.2. There wasn't observed any dependence of absorbance, neither in more alkaline BRB solutions, either at 530 nm wavelength.

But the dependence of ΔAbsorbance at 530 nm and 750 nm wavelengths on the concentration of NaHCO<sub>3</sub> in the BRB solution, pH 2.3 was observed, when a potential was alternated from –0.9 V to +0.2 V vs. Ag/AgCl<sub>(3M KCl)</sub>.

## Acknowledgement:

This project has received funding from European Regional Development Fund (project No. 01.2.2-LMT-K-718-01-0063) under grant agreement with the Research Council of Lithuania (LMTLT). Also, we are grateful to Mantas Žvirblis and Karolis Treinys for their assistance during experiments.

## References

- Ratautaite, V.; Bagdziūnas, G.; Ramanavicius, A.; Ramanaviciene, A., An Application of Conducting Polymer Polypyrrole for the Design of Electrochromic pH and CO<sub>2</sub> Sensors. *J. Electrochem. Soc.* 2019, 166, (6), B297-B303.
- Ratautaite, V.; Plausinaitis, D.; Baleviciute, I.; Mikolajune, L.; Ramanaviciene, A.; Ramanavicius, A., Characterization of Caffeine-Imprinted Polypyrrole by a Quartz Crystal Microbalance and Electrochemical Impedance Spectroscopy. *Sensor Actuat B-Chem* 2015, 212, 63-71.
- Samukaitė-Bubnienė, U.; Valiūnienė, A.; Bucinskas, V.; Genys, P.; Ratautaite, V.; Ramanaviciene, A.; Aksun, E.; Tereshchenko, A.; Zeybek, B.; Ramanavicius, A., Towards supercapacitors: Cyclic voltammetry and fast Fourier transform electrochemical impedance spectroscopy based evaluation of polypyrrole electrochemically deposited on the pencil graphite electrode. *Colloids and Surfaces A: Physicochemical and Engineering Aspects* 2020, 610, 125750.
- Ramanavicius, A.; Tereshchenko, A.; Plakusiene, I.; Ratautaite, V.; Deshmukh, M. A.; Smyntyna, V.; Oztekin, Y.; Bubnienė, U.; Ramanaviciene, A. In *Electrochemical Formation of 'Synthetic Receptors' Based on Conducting Polymers, Nanomaterials in Biomedical Application and Biosensors (NAP- 2019)*, Singapore, 2020; Springer Singapore: Singapore, 2020; pp 239-245.

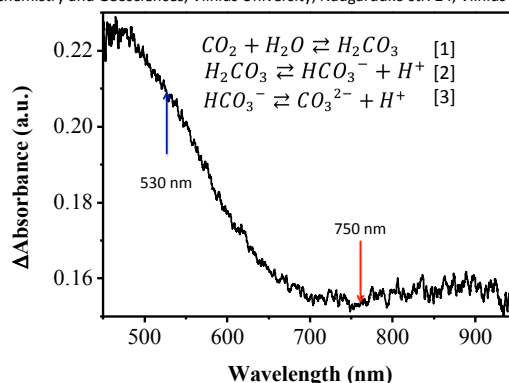

Fig. 1. The UV-vis absorbance spectra of glass/ITO/Ppy.

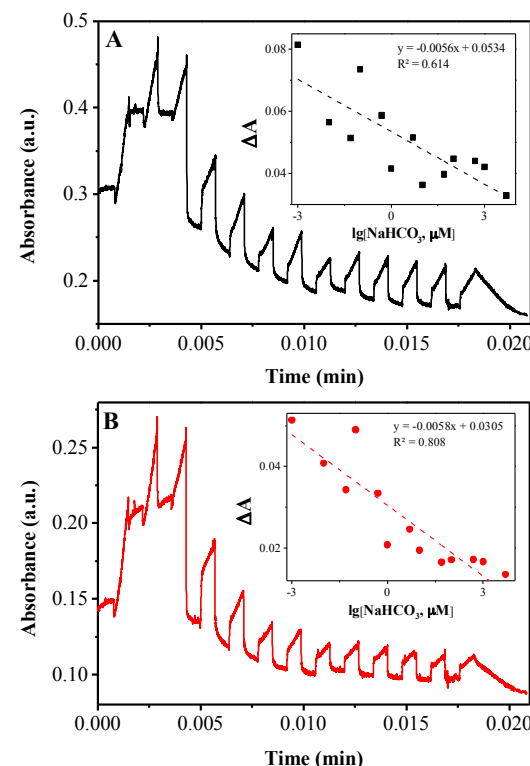

Fig. 2. Absorbance at wavelengths of (A) 530 nm and (B) 750 nm vs. time profile obtained during a potential alternation from –0.9 V to +0.2 V vs Ag/AgCl<sub>(3M KCl)</sub> in the BRB solution, pH 2.3.

The inserts: The dependence of ΔA at 530 nm and 750 nm wavelengths on the concentration of NaHCO<sub>3</sub>. ΔA=ΔAbsorbance = Absorbance<sub>–0.9 V</sub> – Absorbance<sub>+0.2 V</sub>.
